# Supplementary material
Source: Springer Nature journal article supplement (https://www.springermedizin.de/resource/supplementary/12885_2012_3581_MOESM2_ESM.pdf/9463242)
Supplement: MOESM2 [file 9463242]

A

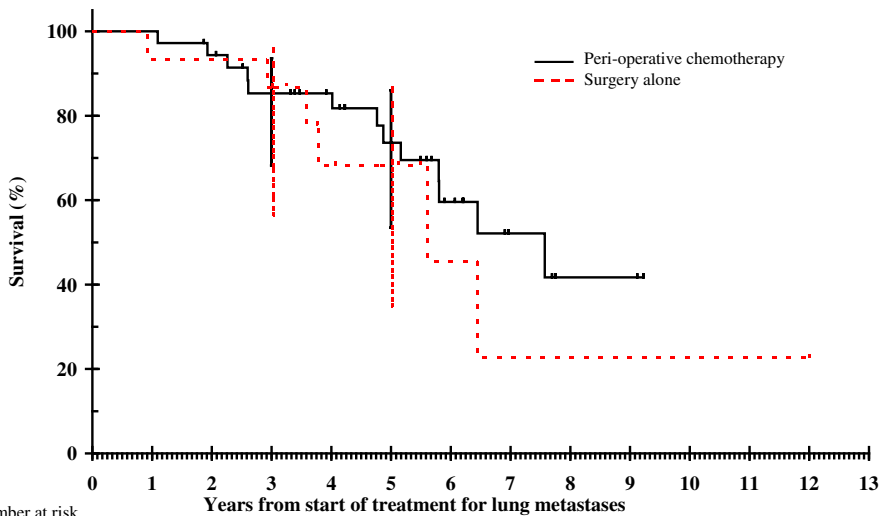

Number at risk

|                            |    |    |    |    |    |    |    |   |   |   |   |   |   |   |   |   |   |
|----------------------------|----|----|----|----|----|----|----|---|---|---|---|---|---|---|---|---|---|
| Perioperative chemotherapy | 36 | 35 | 33 | 28 | 24 | 18 | 11 | 5 | 2 | 2 |   |   |   |   |   |   |   |
| No chemotherapy            | 15 | 14 | 14 | 13 | 7  | 5  | 2  | 1 | 1 | 1 | 1 | 1 | 1 | 1 | 1 | 1 | 1 |

B

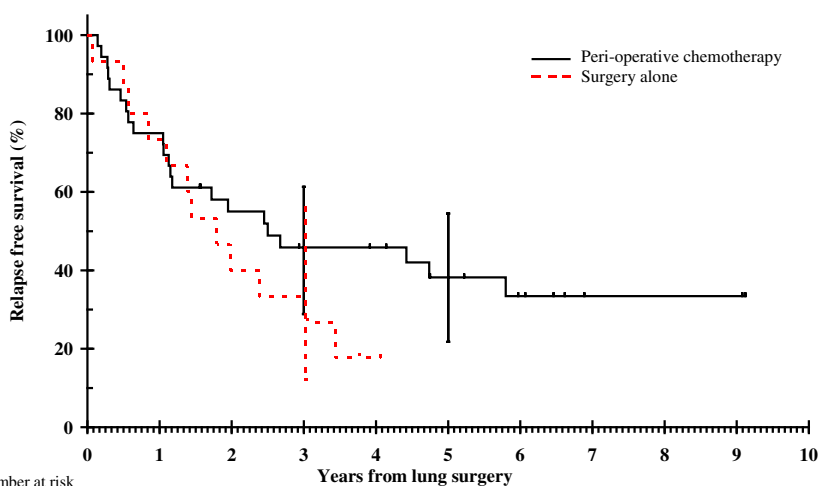

Number at risk

|                            |    |    |    |    |    |   |   |   |   |   |
|----------------------------|----|----|----|----|----|---|---|---|---|---|
| Perioperative chemotherapy | 36 | 27 | 18 | 14 | 13 | 9 | 6 | 2 | 2 | 2 |
| No chemotherapy            | 15 | 11 | 6  | 5  | 1  |   |   |   |   |   |
